# Supplementary material for: High-performance stretchable photodetectors based on epitaxial CdTe ultrathin films
Source: Royal Society of Chemistry journal article supplement (doi:10.1039/d2tc01611g), 2022-01-01
Supplement: d2tc01611g1.pdf [file d2tc01611g1.pdf]

## Supporting Information

### High-performance stretchable photodetector based on epitaxial CdTe ultrathin films

Yupeng Wu,<sup>#a</sup> Yunjie Liu,<sup>#b</sup> Yingming Liu,<sup>a</sup> Shirong Zhao,<sup>a</sup> Fuhai Guo,<sup>a</sup> Siqi Li,<sup>a</sup> Weizhuo Yu,<sup>a</sup>

Guanchu Liu,<sup>a</sup> Jingyi Hao <sup>a</sup> and Lanzhong Hao <sup>\*a</sup>

a. School of Materials Science and Engineering, China University of Petroleum, Qingdao, Shandong 266580, P. R. China.

b. College of Science, China University of Petroleum, Qingdao, Shandong 266580, P. R. China.

\* Address correspondence to (L. Hao): [haolanzhong@upc.edu.cn](mailto:haolanzhong@upc.edu.cn).

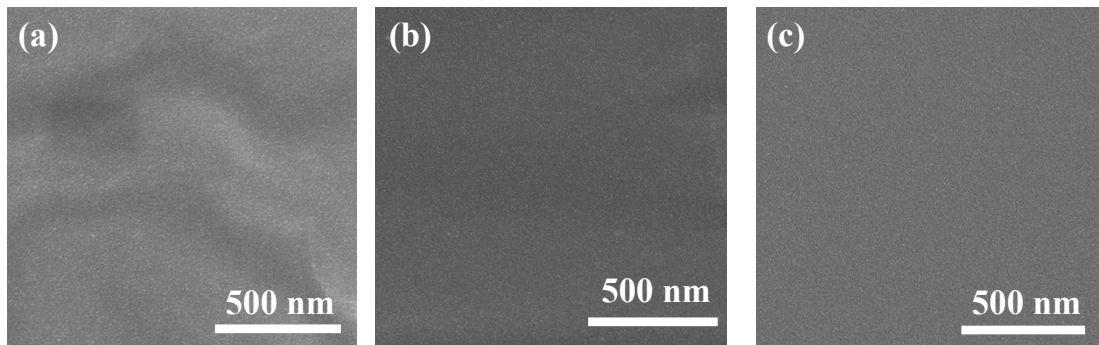

**Fig. S1.** Top-view SEM images of the transferred CdTe films on PDMS under a strain of (a) 0%, (b) 15.0%, (c) 35.0%.

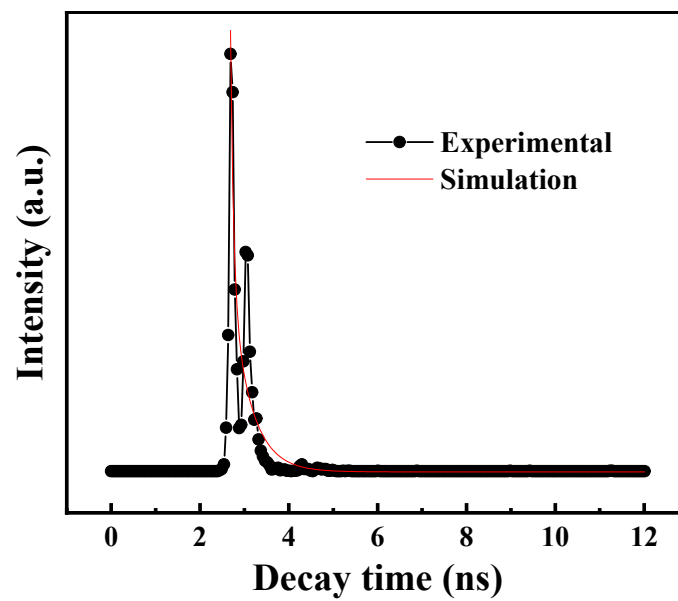

**Fig. S2.** Time-resolved PL decay curve of the CdTe film. The red line is the double exponential fit.

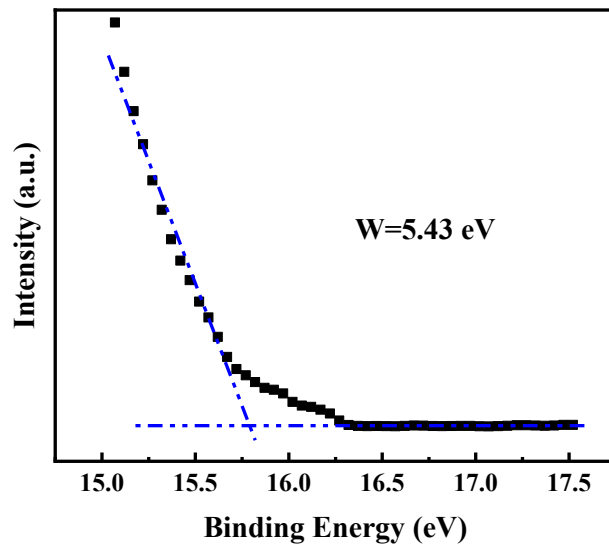

Fig. S3. UPS spectra of the CdTe film. The value at the junction of the horizontal line and the extension line is the cutoff of the highest binding energy.
